# Supplementary material for: Translational Pharmacokinetic/Pharmacodynamic Model for mRNA-3927, an Investigational Therapeutic for the Treatment of Propionic Acidemia
Source: PubMed Central journal article supplement (PMC10066765; doi:10.1089/nat.2022.0036), 2023-03-30
Supplement: Suppl_TableS1.pdf [file Suppl_TableS1.pdf]

**Table S1. PK/PD Model Equations**

(A) PCCA/PCCB mRNA PK model

|                                                                                                                                                                                                    |
|----------------------------------------------------------------------------------------------------------------------------------------------------------------------------------------------------|
| $d(A_1)/dt = \text{input} - CL_{12} * C_1$                                                                                                                                                         |
| $d(A_2)/dt = CL_{12} * C_1 - CL_{23} * C_2 + CL_{32} * C_3 - CL_{20} * C_2$                                                                                                                        |
| $d(A_3)/dt = CL_{23} * C_2 - CL_{32} * C_3$                                                                                                                                                        |
| $C_1 = A_1/V$<br>$C_2 = A_2/V_2$<br>$C_3 = A_3/V$<br>$C_{13} = C_1 + C_3$                                                                                                                          |
| $CL_{12} = tvCL_{12} * (BW/0.025) ** cl\alpha$<br>$CL_{32} = tvCL_{32} * (BW/0.025) ** cl\alpha$<br>$CL_{23} = tvCL_{23} * (BW/0.025) ** cl\beta$<br>$CL_{20} = tvCL_{20} * (BW/0.025) ** cl\beta$ |
| $V = tvV * (BW/0.025) ** 1$<br>$V_2 = tvV_2 * (BW/0.025) ** 1$                                                                                                                                     |

A<sub>1</sub>, amount in compartment 1 (plasma compartment); A<sub>2</sub>, amount in compartment 2 (tissue compartment); A<sub>3</sub>, amount in compartment 3 (plasma compartment); BW, body weight; C<sub>1</sub>, concentration in compartment 1; C<sub>2</sub>, concentration in compartment 2 (tissue compartment); C<sub>3</sub>, concentration in compartment 3; CL<sub>12</sub>, clearance from compartment 1 to compartment 2; CL<sub>20</sub>, tissue elimination clearance; CL<sub>23</sub>, clearance from compartment 2 to compartment 3; CL<sub>32</sub>, clearance from compartment 3 to compartment 2; V, distribution volume of compartment 1 and 3; V<sub>2</sub>, distribution volume of compartment 2; C<sub>13</sub>, total sum of concentrations (C<sub>1</sub> and C<sub>3</sub>) in the plasma compartments; cl $\alpha$ , allometric exponent for CL<sub>12</sub> and CL<sub>32</sub> parameters (clearance from plasma); cl $\beta$ , allometric exponent for CL<sub>23</sub> and CL<sub>20</sub> parameters (clearance from tissue); mRNA, messenger RNA; PD, pharmacodynamic; PK, pharmacokinetic; tv, typical value.

(B) PCC PD model

|                                                                                                           |
|-----------------------------------------------------------------------------------------------------------|
| $d(C_e)/dt = K_{e0} * (C_{13} - C_e)$                                                                     |
| $d(\text{PCC})/dt = K_{\text{syn}} * C_e + K_q * (\text{PCP} - \text{PCC}) - K_{\text{deg}} * \text{PCC}$ |
| $d(\text{PCP})/dt = K_q * (\text{PCC} - \text{PCP})$                                                      |
| $K_{\text{syn}} = C_e * \text{Slope}$                                                                     |

C<sub>13</sub>, plasma concentration of mRNA-3927; C<sub>e</sub>, effect compartment concentration of mRNA-3927; K<sub>deg</sub>, PCC protein degradation rate; K<sub>e0</sub>, equilibrium rate constant for effect compartment; K<sub>q</sub>, intercompartmental rate constant for PCC protein; K<sub>syn</sub>, PCC protein synthesis rate; PCC, propionyl CoA carboxylase; PCP, PCC protein in the peripheral compartment; PD, pharmacodynamic.

(C) 2-MC, 3-HP, C3/C2 PD model

|                                                                                                                                                 |
|-------------------------------------------------------------------------------------------------------------------------------------------------|
| $2\text{-MC} = E_{0\text{2-MC}} + [2\text{-MC}_{\text{base}} * (1 - I_{\text{max}} * \text{PCC}/(\text{IC50}_{\text{2-MC}} + \text{PCC}))]$     |
| $3\text{-HP} = E_{0\text{3-HP}} + [3\text{-HP}_{\text{base}} * (1 - I_{\text{max}} * \text{PCC}/(\text{IC50}_{\text{3-HP}} + \text{PCC}))]$     |
| $\text{C3/C2} = E_{0\text{C3/C2}} + [\text{C3/C2}_{\text{base}} * (1 - I_{\text{max}} * \text{PCC}/(\text{IC50}_{\text{C3/C2}} + \text{PCC}))]$ |

2-MC, 2-methylcitrate; 2-MC<sub>base</sub>, baseline 2-MC amenable to suppression; 3-HP, 3-hydroxypropionate; 3-HP<sub>base</sub>, baseline 3-HP; C2, acetyl carnitine; C3, propionyl carnitine; C3/C2<sub>base</sub>, baseline C3/C2; E<sub>02-MC</sub>, plasma 2-MC levels not affected by mRNA-3927; E<sub>03-HP</sub>, plasma 3-HP levels not affected by mRNA-3927; E<sub>0C3/C2</sub>, plasma C3/C2 levels not affected by mRNA-3927; IC<sub>502-MC</sub>, PCC concentration needed for 50% of maximal 2-MC reduction; IC<sub>503-HP</sub>, PCC concentration needed for 50% of maximal 3-HP reduction; IC<sub>50C3/C2</sub>, PCC concentration needed for 50% of maximal C3/C2 reduction; I<sub>max</sub>, maximum inhibition; PCC, propionyl CoA carboxylase; PD, pharmacodynamic.
